# Supplementary material
Source: PubMed Central journal article supplement (PMC6842042)
Supplement: NIHMS1044092-supplement-supplemental_tables.pdf [file NIHMS1044092-supplement-supplemental_tables.pdf]

**Supplemental Table 1.** The Summary of Cooperative Group Studies

| Group    | Study Number | Study Title                                                                                                                                                                                                                                                                          | Induction                                                                                                                                                                  | Consolidation                                                                                                                                                                                                               |
|----------|--------------|--------------------------------------------------------------------------------------------------------------------------------------------------------------------------------------------------------------------------------------------------------------------------------------|----------------------------------------------------------------------------------------------------------------------------------------------------------------------------|-----------------------------------------------------------------------------------------------------------------------------------------------------------------------------------------------------------------------------|
| Alliance | 10201        | A phase III study of daunorubicin and cytarabine +/- G3139 (Genasense  , oblimersen sodium, NSC # 683428, IND #58842), a BCL2 antisense oligonucleotide, in previously untreated patients with acute myeloid leukemia (AML) $\geq$ 60 years                                          | Cytarabine 100 mg/m <sup>2</sup> continuous IV days 1-7, daunorubicin 60 mg/m <sup>2</sup> days 1-3. Randomization to G3139 7 mg/kg by continuous IV days 1-10 or no G3139 | G3139 7 mg/kg continuous IV days 1-8 and cytarabine 2000 mg/m <sup>2</sup> IV days 4-8 or cytarabine alone 2000 mg/m <sup>2</sup> IV days 1-5 for 2 cycles                                                                  |
| Alliance | 10502        | Dose escalation and phase II study of bortezomib (IND #58443, NSC #681239) added to standard daunorubicin and cytarabine therapy for patients with previously untreated acute myeloid leukemia age 60-75 years                                                                       | Bortezomib 1.3 mg/m <sup>2</sup> IV days 1, 4, 8, and 11, cytarabine 100 mg/m <sup>2</sup> continuous IV days 1 - 7 and daunorubicin 60 mg/m <sup>2</sup> IV days 1-3      | Bortezomib 0.7, 1 or 1.3 mg/m <sup>2</sup> IV days 1, 4, 8, and 11, and cytarabine 2000 g/m <sup>2</sup> IV days 1-5 for 2 cycles                                                                                           |
| Alliance | 10801        | Phase II study of induction (daunorubicin/cytarabine) and consolidation (high-dose cytarabine) chemotherapy plus dasatinib (NSC #732517, IND #73969) and continuation therapy with dasatinib alone in newly diagnosed patients with core binding factor acute myeloid leukemia (AML) | Cytarabine 200 mg/m <sup>2</sup> continuous IV days 1- 7, daunorubicin 60 mg/m <sup>2</sup> IV days 1-3 and dasatinib 100 mg/d po days 8-21                                | Cytarabine 3000 mg/m <sup>2</sup> (1000 mg/m <sup>2</sup> for age 60 years or older) IV days 1, 3, 5, dasatinib 100 mg po daily days 6-26 x 4 cycles. Thereafter, continuation with dasatinib 100 mg po daily for 12 months |
| Alliance | 11001        | A phase II study incorporating sorafenib (IND 69896, NSC 724772) into the therapy of patients age $\geq$ 60 years with FLT3 mutated acute myeloid leukemia                                                                                                                           | Cytarabine 100 mg/m <sup>2</sup> continuous IV days 1-7, daunorubicin 60 mg/m <sup>2</sup> IV days 1-3 and sorafenib 400 mg po twice daily days 1-7                        | Consolidation 1 and 2. cytarabine 2000 mg/m <sup>2</sup> /d IV days 1 - 5 and sorafenib 400 mg po twice daily days 1- 28 for 28 day cycles. Continuation with sorafenib 400 mg po twice daily for 12 cycles of 28 days      |
| Alliance | 11002        | A randomized phase II trial of decitabine-based induction strategies for patients $\geq$ 60 years old with acute myeloid leukemia                                                                                                                                                    | Decitabine 20 mg/m <sup>2</sup> IV days 1-10 x 2-4 cycles every 28 days. Randomized to bortezomib 1.3 mg/m <sup>2</sup> SC day 1, 4, 8, and 11.                            | Decitabine 20 mg/m <sup>2</sup> IV days 1-5 q 28 days. Bortezomib treated patients receive bortezomib 1.3 mg/m <sup>2</sup> /day SC day 1. No limit on number of cycles.                                                    |

**Supplemental Table 2. Cytogenetics Risk Groups**

| <b>Cytogenetics Risk Groups</b> | <b>Alliance<br/>(N=52)</b> | <b>ECOG-ACRIN<br/>(N=135)</b> | <b>SWOG<br/>(N=24)</b> | <b>CIBMTR<br/>(N=431)</b> |
|---------------------------------|----------------------------|-------------------------------|------------------------|---------------------------|
| <b>N</b>                        | 45                         | 91                            | 14                     | 416                       |
| <b>Favorable</b>                | 11 (24%)                   | 6 (7%)                        | 0 (0%)                 | 7 (1.7%)                  |
| <b>Intermediate</b>             | 26 (58%)                   | 53 (58%)                      | 9 (64%)                | 250 (60%)                 |
| <b>Poor</b>                     | 8 (18%)                    | 32 (35%)                      | 5 (36%)                | 159 (38%)                 |
| <b>Missing</b>                  | 7                          | 44                            | 10                     | 15                        |

**Supplemental Table 3.** Selection for AlloHCT and CT Populations

| Selection table for alloHCT population                 | Excluded                                                 | Included |
|--------------------------------------------------------|----------------------------------------------------------|----------|
| <b><u>INCLUSION:</u></b>                               |                                                          |          |
| 1 <sup>st</sup> allo-HCT for AML between 2008 and 2012 |                                                          | 4555     |
| Age between 60 and 75                                  | 3699                                                     | 856      |
| APL                                                    | 1                                                        | 855      |
| CR1 prior to HCT                                       | PIF (n=118); CR2 (n=131)<br>≥CR3 (n=13); Relapse (n=103) | 490      |
| HLA-identical sibling or unrelated donor               | Other related (n=20)<br>Twin (n=6); Missing (n=1)        | 463      |
| <b><u>EXCLUSION:</u></b>                               |                                                          |          |
| No consent                                             | 12                                                       | 451      |
| Incomplete research form                               | 11                                                       | 440      |
| Missing date of CR1                                    | 9                                                        | 431      |
| Selection table for Alliance CT population             | Excluded                                                 | Included |
| <b><u>INCLUSION:</u></b>                               |                                                          |          |
| Dataset from Alliance                                  |                                                          | 378      |
| Age between 60 and 75                                  | 112                                                      | 266      |
| Complete response achieved                             | 99                                                       | 167      |
| Received consolidation therapy                         | 78                                                       | 89       |
| <b><u>EXCLUSION:</u></b>                               |                                                          |          |
| Subsequent HCTs                                        | 37                                                       | 52       |
| Selection table for SWOG CT population                 | Excluded                                                 | Included |
| <b><u>INCLUSION:</u></b>                               |                                                          |          |
| Dataset from SWOG                                      |                                                          | 91       |
| <b><u>EXCLUSION:</u></b>                               |                                                          |          |
| Subsequent HCTs                                        | 6                                                        | 85       |
| Age not between 60-75                                  | 48                                                       | 37       |
| Missing consolidation therapy start date               | 13                                                       | 24       |
| Selection table for ECOG-ACRIN CT population           | Excluded                                                 | Included |
| <b><u>INCLUSION:</u></b>                               |                                                          |          |
| Dataset from ECOG-ACRIN                                |                                                          | 199      |
| <b><u>EXCLUSION:</u></b>                               |                                                          |          |
| Subsequent HCTs                                        | 1                                                        | 198      |

| Selection table for ECOG-ACRIN CT population | Excluded | Included |
|----------------------------------------------|----------|----------|
| Age not between 60-75                        | 36       | 162      |
| Missing consolidation therapy start date     | 27       | 135      |

**Abbreviations:** alloHCT: allogeneic hematopoietic cell transplantation, CT: chemotherapy consolidation, AML: acute myeloid leukemia, APL: acute promyelocytic leukemia, CR1: first complete remission, HCT: hematopoietic cell transplantation, PIF: primary induction failure, HLA: human leukocyte antigen, SWOG: Southwest Oncology Group, ECOG-ACRIN: Eastern Cooperative Oncology Group-American College of Radiology Imaging Network
